# Supplementary material for: First report of fatty acids in Mimosadiplotricha bee pollen with in vitro lipase inhibitory activity
Source: PeerJ journal article supplement (doi:10.7717/peerj.12722), 2022-01-03

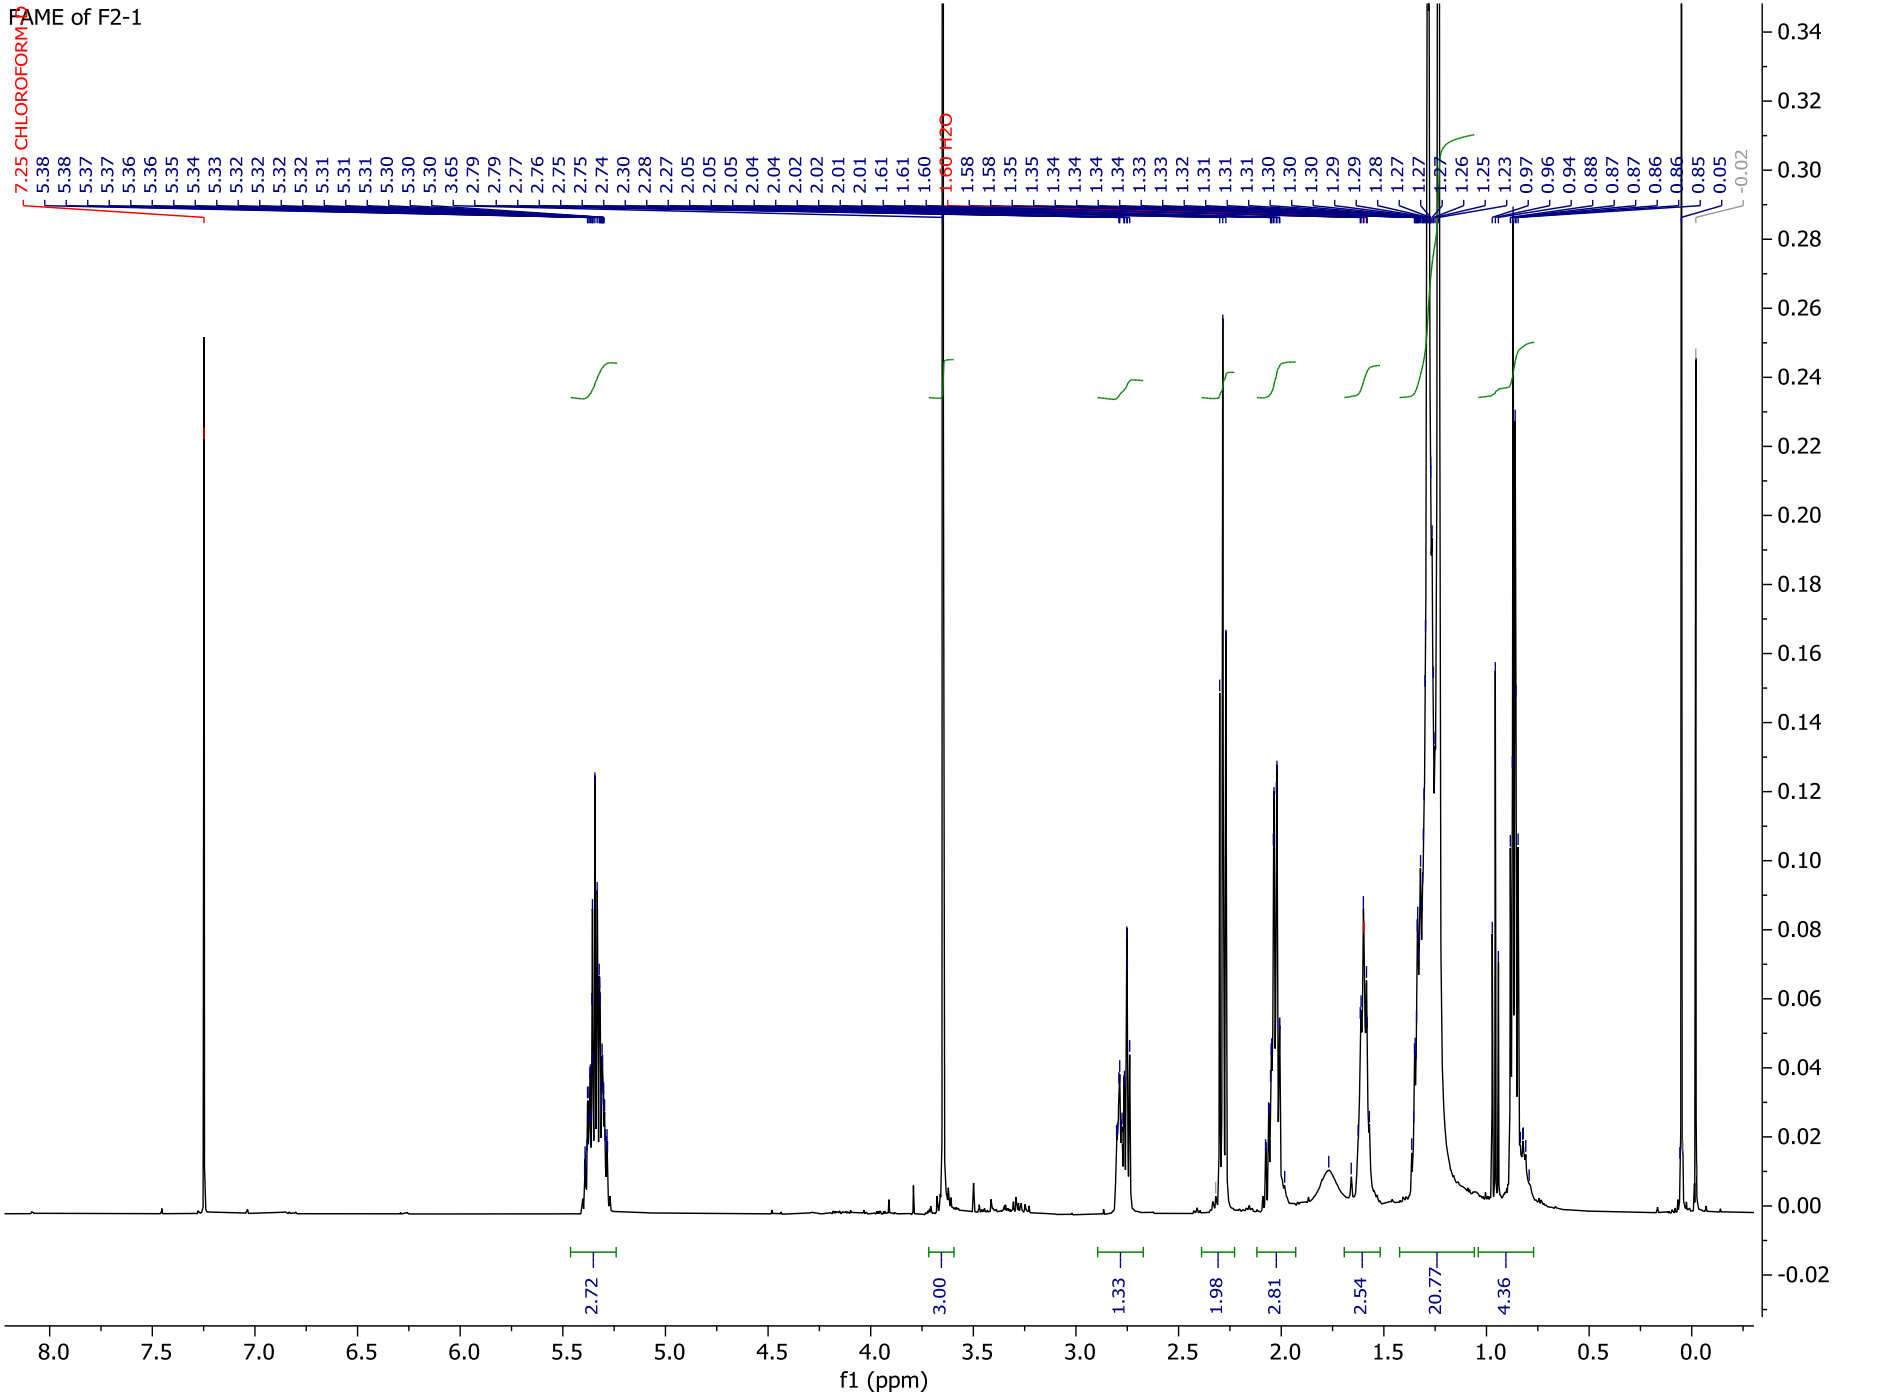

Supplement: Supplement_3_2nd_rev.pdf [file Supplement_3_2nd_rev.pdf]
