# Supplementary material for: First report of fatty acids in Mimosadiplotricha bee pollen with in vitro lipase inhibitory activity
Source: PeerJ. 2022 Jan 3;10:e12722. doi: 10.7717/peerj.12722 (PMC8734463; doi:10.7717/peerj.12722)
Supplement: Supplemental Information 1 [file peerj-10-12722-s001.xlsx]

## Sheet: Sheet1
Supplement 1.
Inhibitory activity	Sample	Concentration (µg/mL)	Replication no.
			R1	R2	R3
a-amylase	DCMXBP	125	31.08	28.79	30.33
		250	33.78	34.85	35.25
		500	33.78	39.39	34.43
		1000	37.84	40.15	39.34
		2000	53.38	51.52	54.1
		IC50	1818.96	1824.76	1733.73
Lipase	DCMCBP	200	32.33	31.6	30.58
		400	48.68	50.99	48.74
		600	58.83	56.37	57.37
		800	61.65	59.25	61.15
		1000	65.04	61.22	65.11
		IC50	443.84	461.55	470.06
	DCMMBP	200	22.36	20.2	22.77
		400	44.71	40.4	43.56
		600	57.68	55.8	55.25
		800	68.86	63.6	62.38
		1000	71.86	70.6	68.91
		IC50	472.63	519.09	510.68
	DCMNBP	200	28.01	32.14	33.27
		400	37.97	40.93	39.57
		600	41.92	44.17	42.81
		800	46.99	45.06	46.76
		1000	55.26	53.32	53.78
		IC50	850	897.67	880.62
	DCMXBP	200	26.03	25.18	26.66
		400	34.65	34.35	35.09
		600	42.01	42.63	42.37
		800	47.04	44.42	45.02
		1000	50.45	54.86	52.96
		IC50	994.69	919.27	967.53
	DCMABP	200	21.76	21	22.57
		400	39.52	34.8	37.82
		600	47.9	43.8	46.93
		800	52.5	55.2	53.47
		1000	65.47	63.8	62.57
		IC50	624.83	662.86	650.57
	DCMMBP2	12.5	1.87	1.33	2.13
		25	11.21	11.82	14.49
		50	18.96	15.14	14.1
		100	47.8	50.07	48.27
		200	76.1	72.78	71.81
		IC50	125.23	129.05	131.17
	DCMMBP2-1	12.5	8.19	12.89	12.25
		25	21.14	28.76	28.52
		50	47.43	52.73	51.01
		100	68.38	71.4	70.13
		200	86.86	85.12	83.56
		IC50	56.49	49.66	51.73
