# Supplementary material for: First report of fatty acids in Mimosadiplotricha bee pollen with in vitro lipase inhibitory activity
Source: PeerJ. 2022 Jan 3;10:e12722. doi: 10.7717/peerj.12722 (PMC8734463; doi:10.7717/peerj.12722)
Supplement: Supplemental Information 2 [file peerj-10-12722-s002.xlsx]

## Sheet: Sheet1
Supplement 2.
Inhibitory activity	Positive control	Concentration (µg/mL)	Replicate no.
			R1	R2	R3
a-amylase	acarbose	2.5	1.02	2.08	5.43
		5	12.24	15.63	17.39
		10	20.41	25	27.17
		20	39.8	44.79	45.65
		40	59.18	61.46	57.61
		IC50	25.78	27.49	30.98
AChE	Physostigmine	0.015625	8.54	9.64	7.65
		0.03125	26.92	23	23.67
		0.0625	41.82	42.56	37.81
		0.125	61.51	61.71	62.63
		0.25	82.34	81.68	83.84
		0.5	91.9	92.84	92.64
		IC50	0.081	0.084	0.082
Lipase	Orlistat	0.0025	10.95	8.58	11.96
		0.005	15.36	15.84	17.22
		0.01	26.8	23.1	24.08
		0.02	57.52	56.77	58.21
		0.04	86.27	86.96	88.52
		IC50	0.021	0.02	0.021
